# Supplementary material for: Tetraphenylethylene derivative capped CH3NH3PbBr3 nanocrystals: AIE-activated assembly into superstructures
Source: Royal Society of Chemistry journal article supplement (doi:10.1039/c6fd00167j), 2016-07-13
Supplement: c6fd00167j1.pdf [file c6fd00167j1.pdf]

## Supporting Information

# Tetraphenylethylene Derivatives Capped CH<sub>3</sub>NH<sub>3</sub>PbBr<sub>3</sub> Nanocrystals: AIE-Activated Assembly into Superstructures

*Feng Zhang, Tianye Zhou, Guogang Liu, Jianbing Shi, Haizheng Zhong\*, and Yuping Dong\**

Beijing Key Laboratory of Nanophotonics and Ultrafine Optoelectronic Systems, School of Materials Science & Engineering, Beijing Institute of Technology, 5 Zhongguancun South Street, Haidian District, Beijing, 100081, China

E-mail: Y. D., [chdongyp@bit.edu.cn](mailto:chdongyp@bit.edu.cn); H. Z., [hzzhong@bit.edu.cn](mailto:hzzhong@bit.edu.cn)

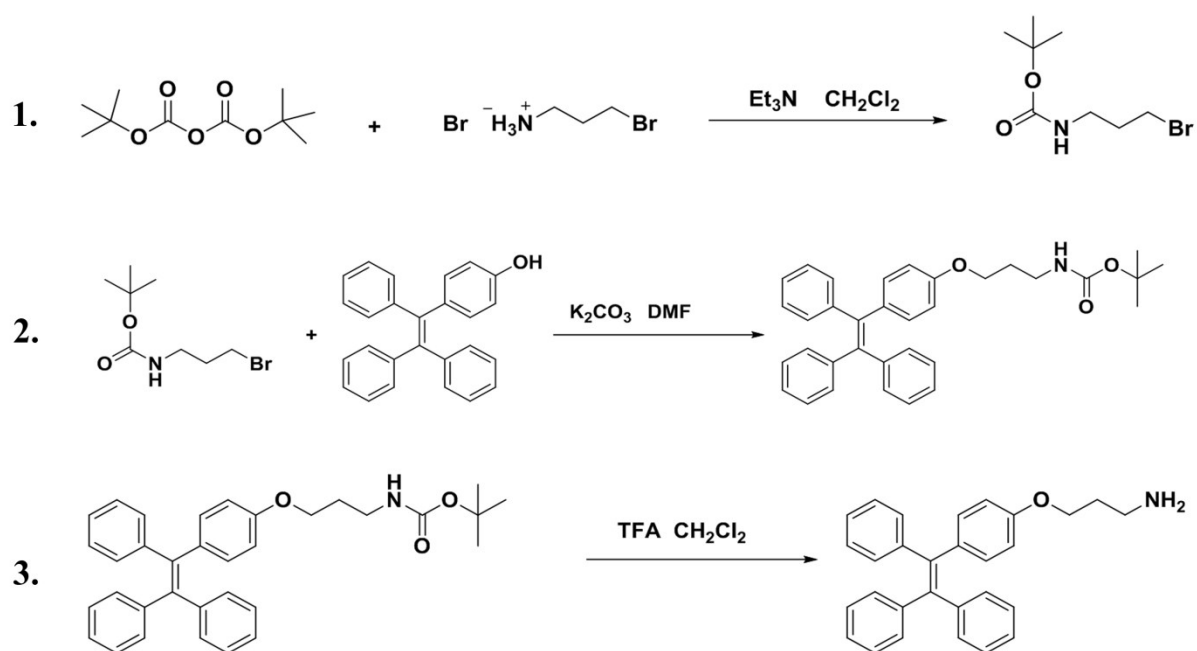

**Scheme S1.** Synthetic route of TPES-3.

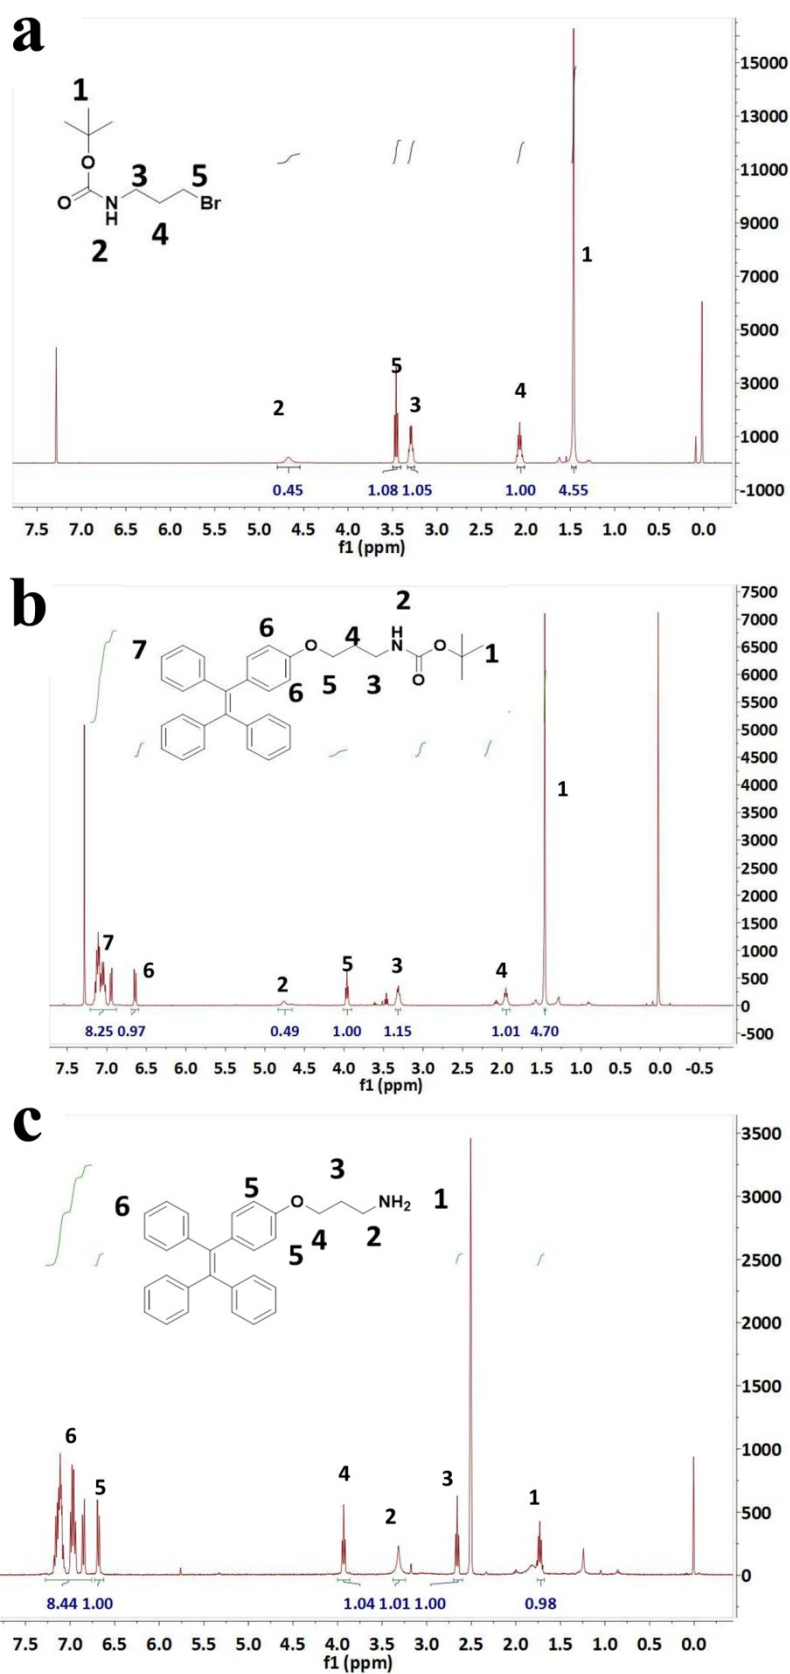

**Figure S1.**  $^1\text{H}$  NMR spectra of tert-butyl (3-bromopropyl)carbamate (a), tert-butyl (3-(4-(1,2,2-triphenylvinyl)phenoxy)propyl)carbamate (b) and 3-(4-(1,2,2-triphenylvinyl)phenoxy)propan-1-amine (c).

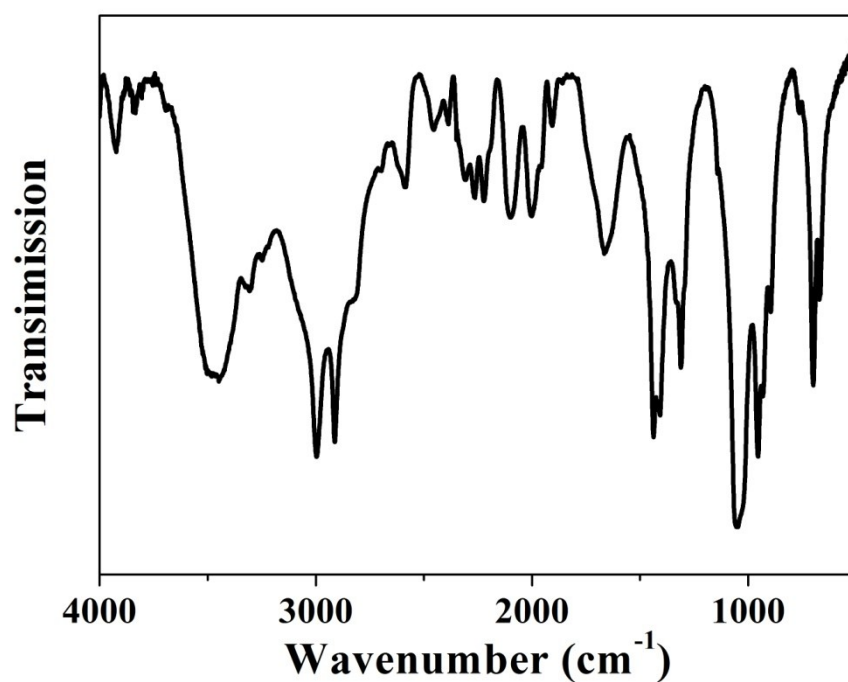

**Figure S2.** FTIR spectrum of TPEs-3.

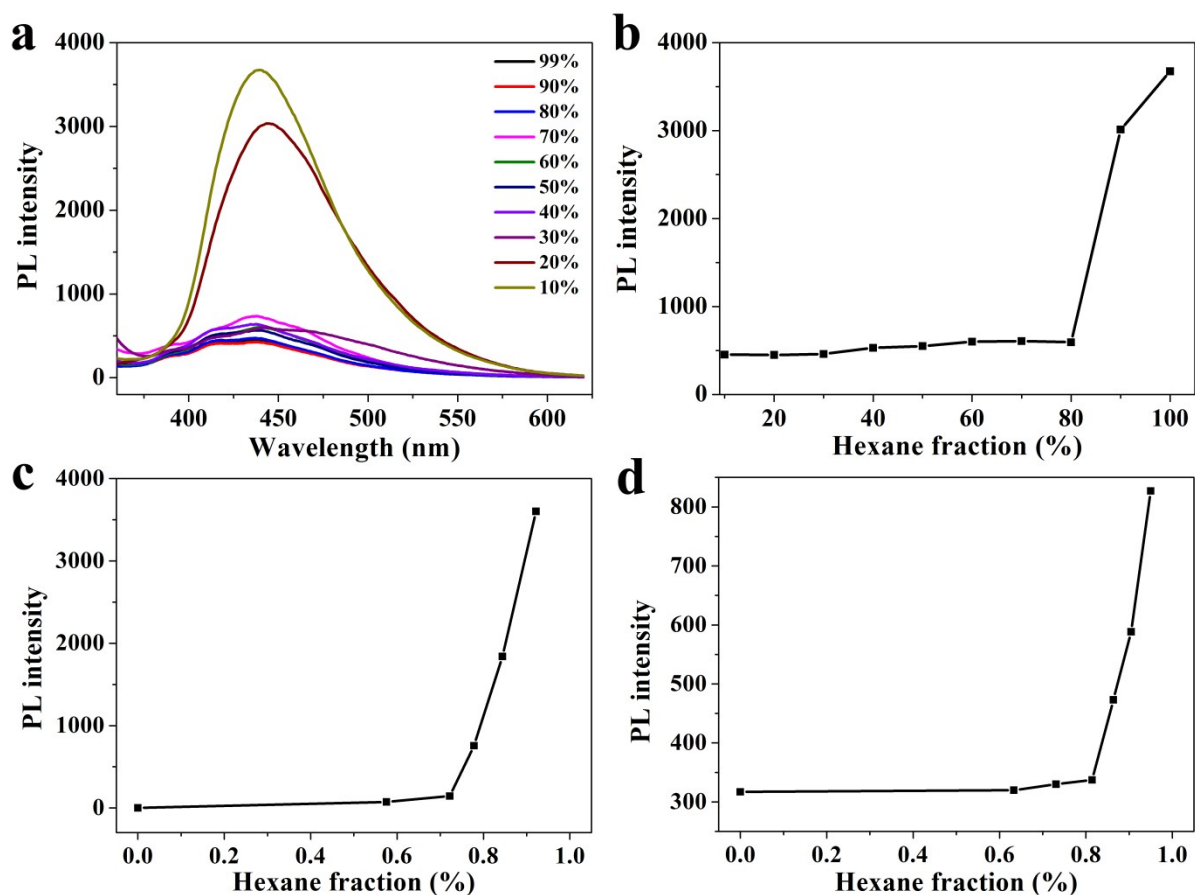

**Figure S3.** a. Emission spectra of TPEs-3 dissolved in dichloromethane/hexane mixtures with different volume ratio. b, c, d. Plot of PL intensities of TPE derivatives (TPEs-3(b), TPEs-4(c), TPEs-8(d)) versus hexane fraction.

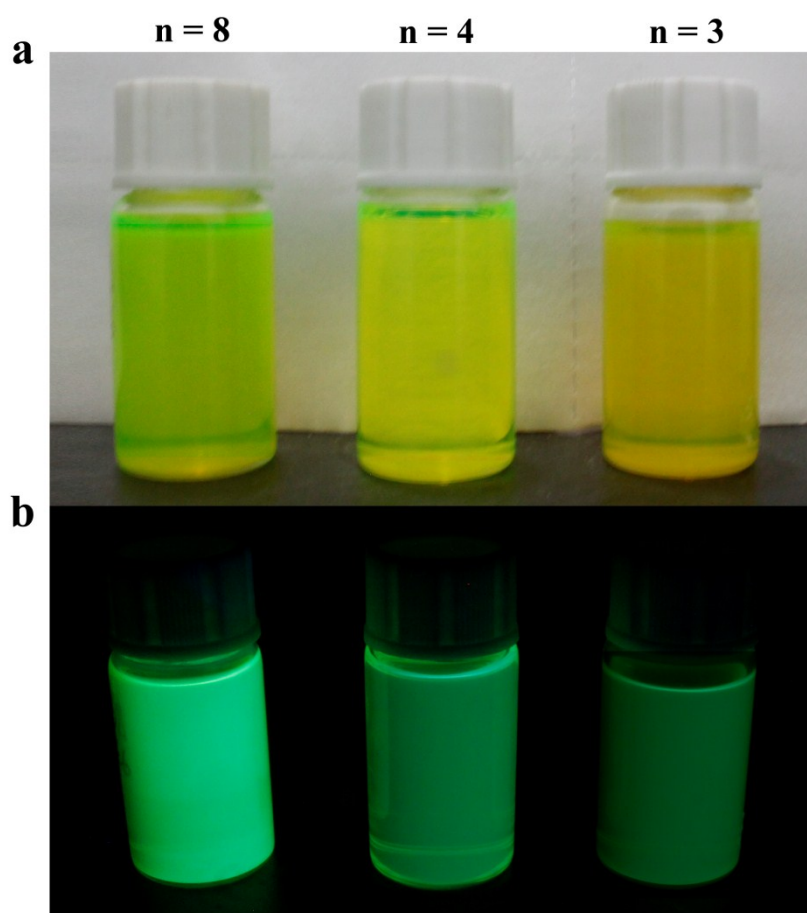

**Figure S4.** Photos of typical solutions of  $\text{CH}_3\text{NH}_3\text{PbBr}_3$  nanocrystals fabricated using TPE derivatives with different chain length. a. Under ambient light. b. Under UV (365 nm) radiation.

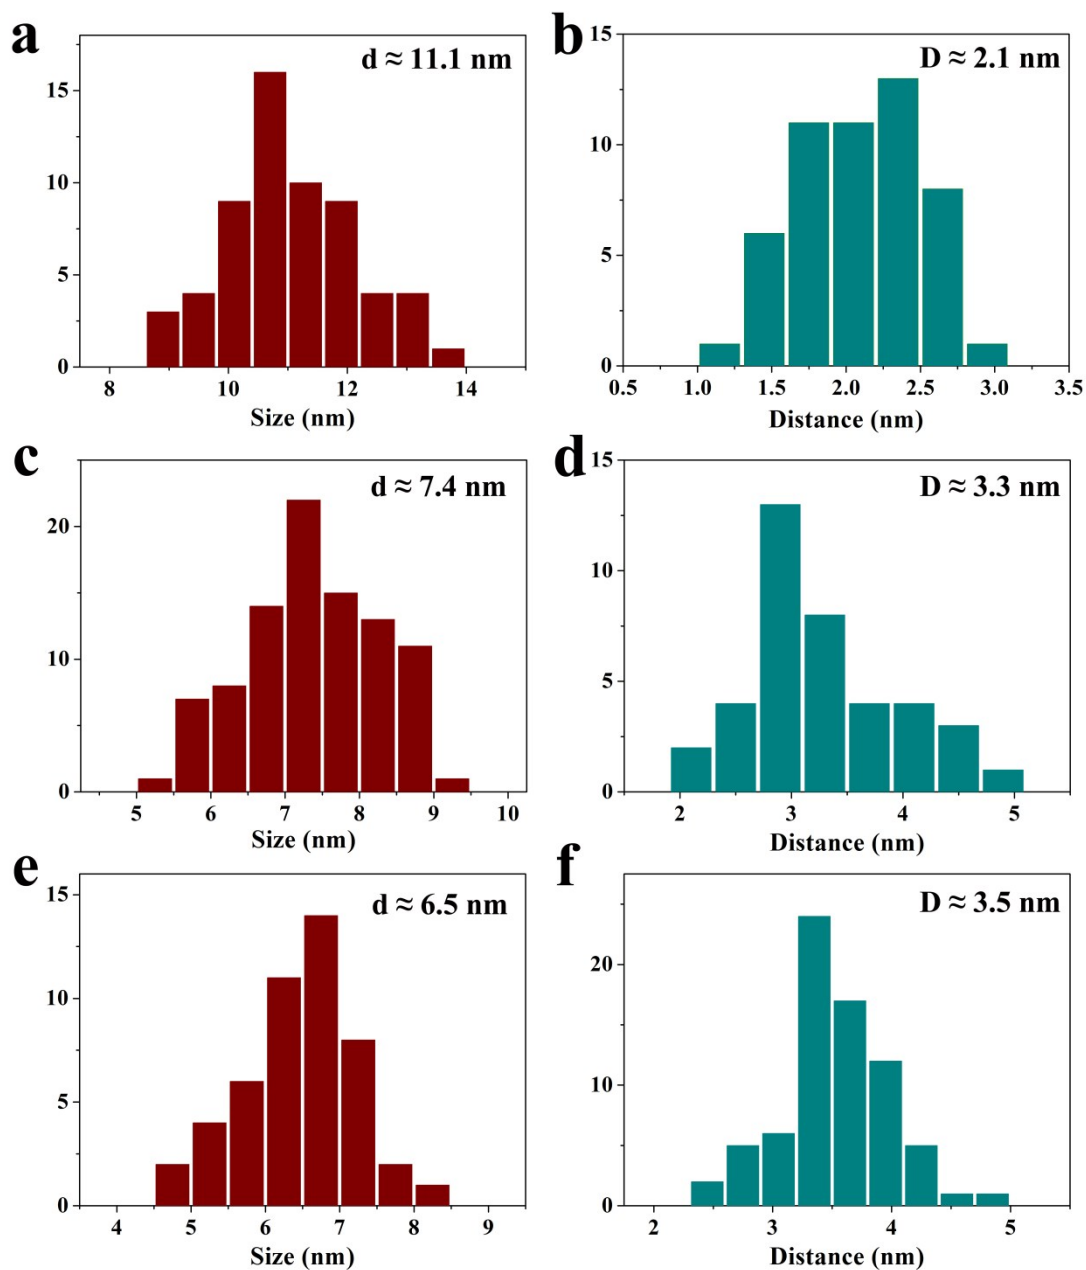

**Figure S5.** Size and distance distribution of resultant  $\text{CH}_3\text{NH}_3\text{PbBr}_3$  nanocrystals. a, c, e. Size distributions of  $\text{CH}_3\text{NH}_3\text{PbBr}_3$  nanocrystals fabricated by TPEs-3, TPEs-4 and TPEs-8. b, d, f. Distance distributions of  $\text{CH}_3\text{NH}_3\text{PbBr}_3$  nanocrystals fabricated by TPEs-3, TPEs-4 and TPEs-8.

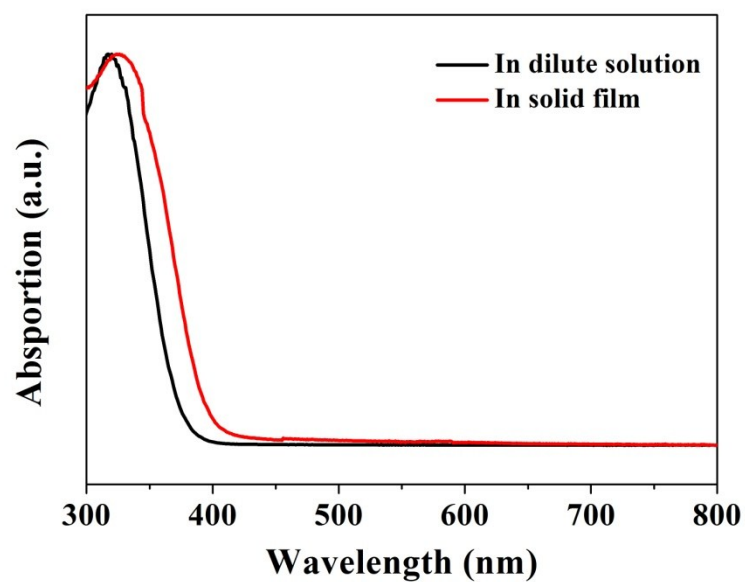

**Figure S6.** Absorption spectra of TPE derivative ( $n = 3$ ) in dilute solution (black) and in solid film (red).

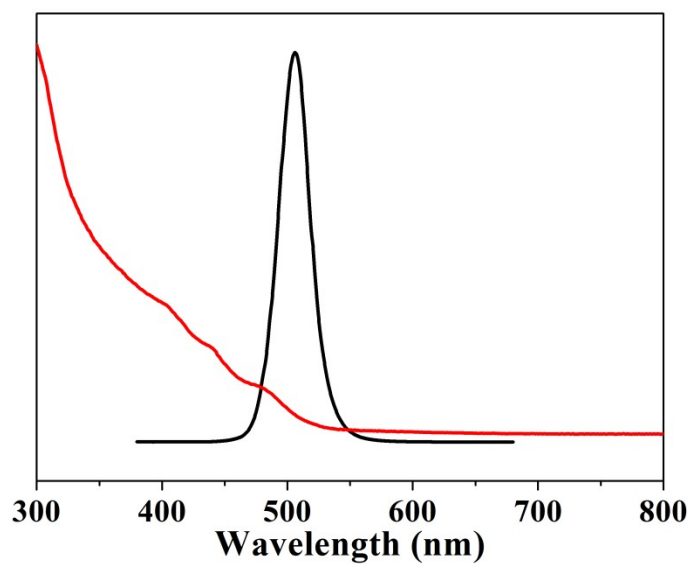

**Figure S7.** Absorption and PL spectra of  $\text{CH}_3\text{NH}_3\text{PbBr}_3$  nanocrystals fabricated using octylamine.
